# Supplementary material
Source: HighWire-hosted journal article supplement (http://jpet.aspetjournals.org/highwire/filestream/136552/field_highwire_adjunct_files/0/223107supplementary_figs.pdf)
Supplement: 223107supplementary_figs.pdf [file 223107supplementary_figs.pdf]

## A novel partial agonist of PPAR $\gamma$ with excellent effect on insulin resistance and type 2 diabetes

Hui-juan Liu, Cheng-yu Zhang, Fei Song, Ting Xiao, Jing Meng, Qiang Zhang, Cai-li Liang, Shan Li, Jing Wang, Bo Zhang, Yan-rong Liu, Tao Sun and Hong-gang Zhou

### 1. Methods for expression and purification of PPAR $\gamma$ -LBD

The PPAR $\gamma$ -LBD (the ligand binding domain of human PPAR $\gamma$ , residues 206–477) was cloned into the expression vector pET15b. *E.coli* BL21 (DE3) host cells transformed with this expression plasmid were grown in LB at 37 °C to an A<sub>600</sub> of 1 and induced with 0.1 mM IPTG at 16 °C [13]. The cells were harvested, resuspended in extract buffer (50 mM Tris, pH 8.0, 250 mM NaCl, and 10% glycerol), and lysed by French press. The lysate was centrifuged at 12,000 rpm for 30 min. The supernatant was loaded onto a Ni-affinity column. The column was washed with extract buffer, and the protein was eluted with wash buffer (50 mM Tris, pH 8.0, 250 mM NaCl, 10% glycerol, and 100 mM imidazole). The protein was further purified on a Superdex 200 column.

**Fig. S1**

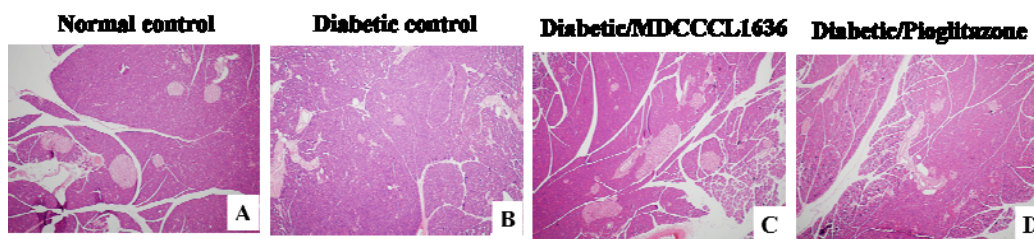

**Fig.S2**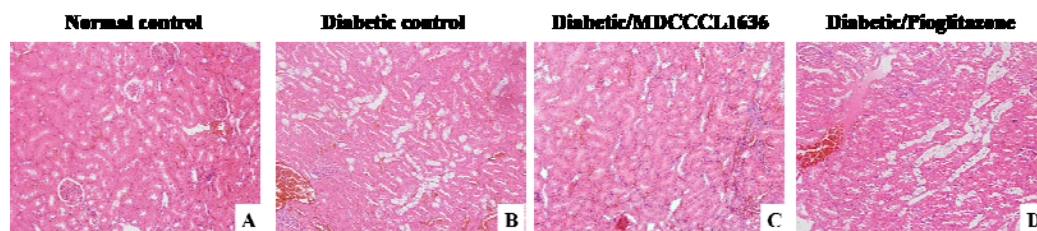**Figure legends:**

Fig. S1. Histopathological changes in islets of pancreas of experimental groups. (A) Light micrograph of normal control rats showing normal  $\beta$  -cells in pancreatic islet (H & E, 40x), (B) HFD-STZ induced diabetic control rats showing pancreatic islet damage (H & E, 40x), (C) MDCCCL1636 at 7.5 mg/kg/day resulted in the reversal of pancreatic islet damage (H & E, 40x), (D) pioglitazone at 30 mg/kg/day resulted in the reversal of pancreatic islet damage (H & E, 40x).

Fig. S2. Histopathological changes in renal tubular epithelial cells of experimental groups. (A) Light micrograph of normal control rats showing normal renal tubular epithelial cells in pancreatic islet (H & E, 40x), (B) HFD-STZ induced diabetic control rats showing the fatty degeneration of renal tubular epithelial cells (H & E, 40x), (C) MDCCCL1636 at 7.5 mg/kg/day resulted in the reversal of the fatty degeneration of renal tubular epithelial cells (H & E, 40x), (D) pioglitazone at 30 mg/kg/day showing no effect on the fatty degeneration of renal tubular epithelial cells (H & E, 40x).
